# Supplementary material
Source: HighWire-hosted journal article supplement (https://erj.ersjournals.com/content/59/4/2102828)

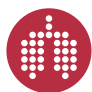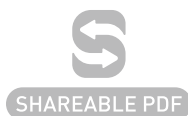

# The paradox of immunosuppressants and COVID-19

Guang-Shing Cheng<sup>1</sup> and Scott E. Evans<sup>2</sup>

<sup>1</sup>Clinical Research Division, Fred Hutchinson Cancer Research Center and Division of Pulmonary Critical Care and Sleep Medicine, University of Washington School of Medicine, Seattle, WA, USA. <sup>2</sup>Dept of Pulmonary Medicine, University of Texas MD Anderson Cancer Center, Houston, TX, USA.

Corresponding author: Guang-Shing Cheng ([gcheng2@fredhutch.org](mailto:gcheng2@fredhutch.org))

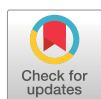

Shareable abstract (@ERSpublications)

**Lessons learned from a large registry analysis show worse COVID-19 outcomes for patients previously exposed to glucocorticoids** <https://bit.ly/306rNrK>

**Cite this article as:** Cheng G-S, Evans SE. The paradox of immunosuppressants and COVID-19. *Eur Respir J* 2022; 59: 2102828 [DOI: 10.1183/13993003.02828-2021].

This single-page version can be shared freely online.

Copyright ©The authors 2022.

This version is distributed under the terms of the Creative Commons Attribution Non-Commercial Licence 4.0. For commercial reproduction rights and permissions contact [permissions@ersnet.org](mailto:permissions@ersnet.org)

Received: 29 Oct 2021

Accepted: 3 Nov 2021

For millions of people, taking immunosuppressive medication to control or prevent disease is a daily reality [1]. Rheumatological disease, inflammatory lung disease, organ transplantation and graft-versus-host disease are but a few of the immune dysregulation syndromes that may require short- or long-term immunosuppressive therapy (IST). Patients taking ISTs are frequently regarded as immunocompromised, sharing risks of increased infection susceptibility with cancer patients receiving chemotherapy, those with profound neutropenia from haematological malignancies, and individuals living with HIV. In the context of the immune-mediated respiratory failure associated with coronavirus disease 2019 (COVID-19), an apparent paradox arises: can ISTs both promote and protect against severe COVID-19?

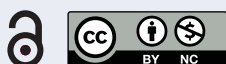

Supplement: inline-supplementary-material-1 [file inline-supplementary-material-1.pdf]
